# Supplementary material
Source: Copernicus journal article supplement (doi:10.5194/bg-23-4083-2026)
Supplement: Supplementary file [file bg-23-4083-2026-supplement-title-page.pdf › bg-23-4083-2026-supplement-title-page.pdf]

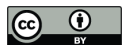

*Supplement of*

**Dissecting mesopelagic particulate organic carbon budgets in the North Atlantic: A mechanistic diagnosis and evaluation of PISCESv2\_RC**

**M. Andrea Orihuela-García et al.**

*Correspondence to:* M. Andrea Orihuela-García (andrea.orihuela@bsc.es) and Martí Galí (mgali@icm.csic.es)

- bg-23-4083-2026-supplement-title-page.pdf
- egusphere-2025-2162-supplement-version\_corrected
  - Supplementary\_information-Dissecting\_POC\_budgets\_Orihuela\_Garcia\_2026\_no\_titles\_corrected.pdf
  - file\_S4\_1\_annual\_vertical\_profiles\_experiment\_a67o.xlsx
  - file\_S4\_2\_monthly\_budgets\_zfluxes\_experiment\_a67o.xlsx

The copyright of individual parts of the supplement might differ from the article licence.
